# Supplementary material
Source: PubMed Central journal article supplement (PMC5902406)
Supplement: NIHMS956846-supplement-Supp.pdf [file NIHMS956846-supplement-Supp.pdf]

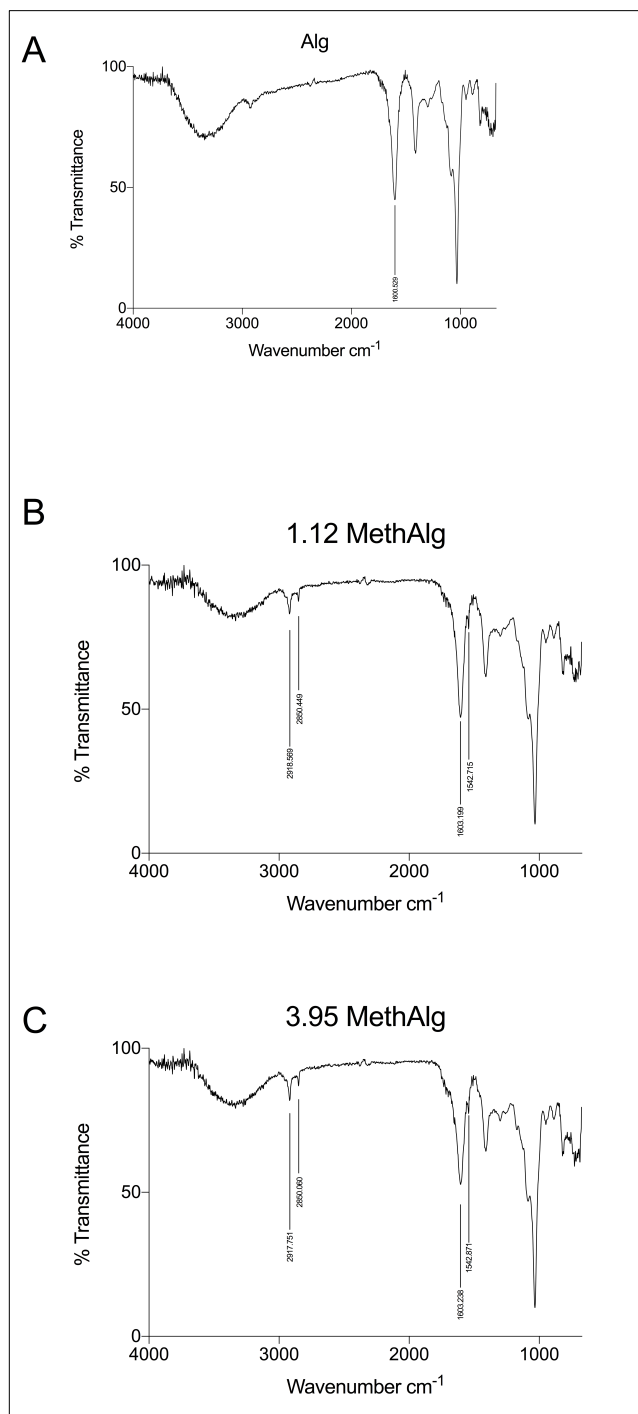

Supplementary Figure S1. FTIR spectra of A) alginate, B) 1.12 MethAlg, and C) 3.95 MethAlg. The shift for alginate ( $1600\text{ cm}^{-1}$ ) shifts and broadens after the coupling of AEMA, the new center of the peak is  $1603\text{ cm}^{-1}$  for 1.12 and 3.95 as a result of the amide I bond, between  $1620$  and  $1640\text{ cm}^{-1}$ . The newly visible shoulder peak at  $1542\text{ cm}^{-1}$  is the amide II peak. The two additional peaks in B) 1.12 MethAlg ( $2918$  and  $2850\text{ cm}^{-1}$ ) and C) 3.95 MethAlg represent ( $2917$

and  $2850\text{ cm}^{-1}$ ) the asymmetric and symmetric stretching vibrations of the additional carbon atoms of AEMA.

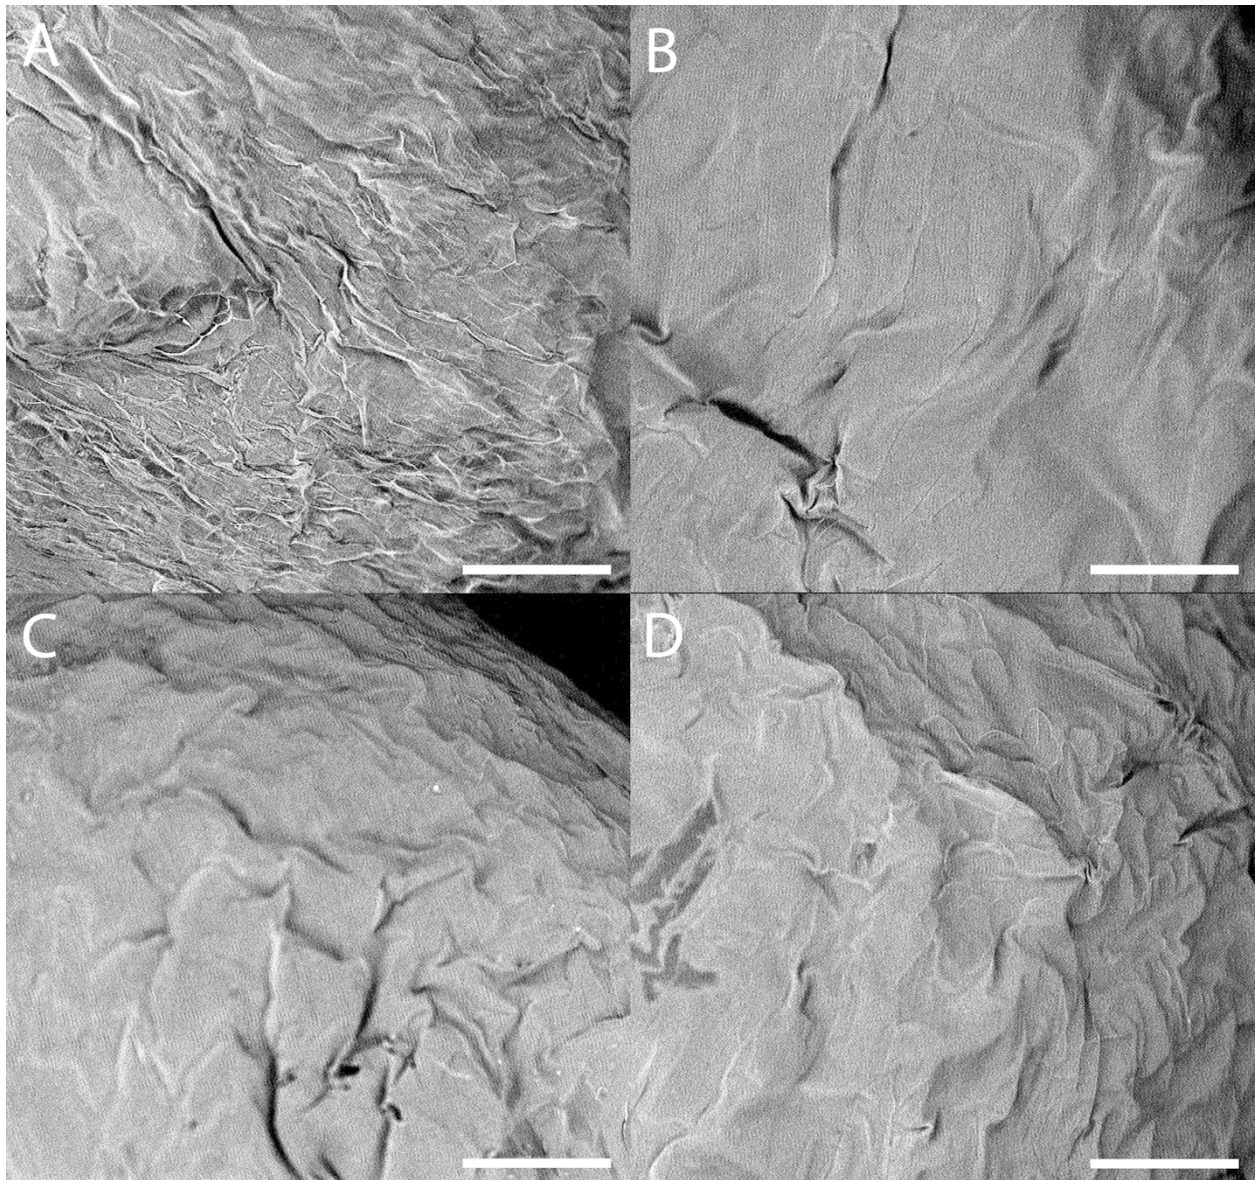

Supplementary Figure S2. Scanning Electron Microscopy (SEM) of Alg (A,B) and 1.12 MethAlg (C,D) at 1.5% (A,C) and 2.0% (B,D). Surface of alginate beads similar for all formulations of microbeads tested. Scale bar represents 200  $\mu\text{m}$ .

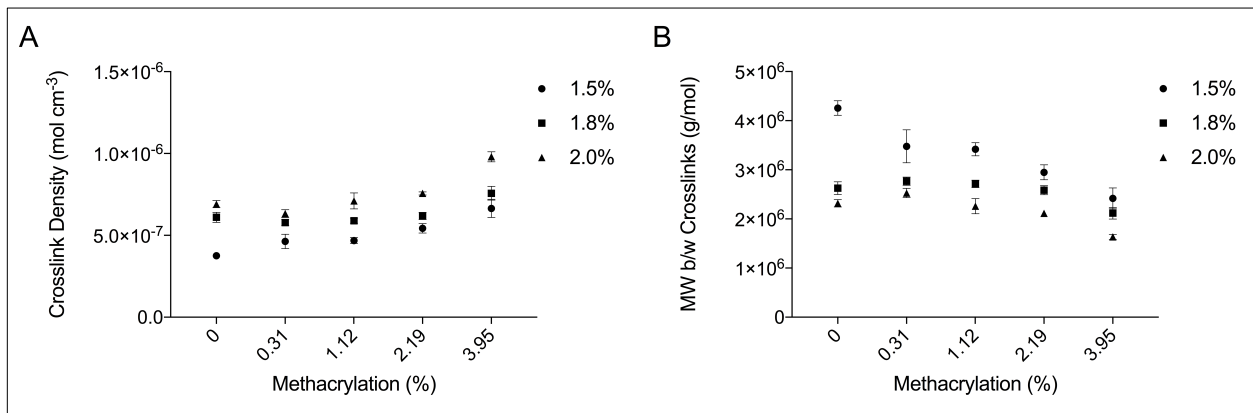

Supplementary Figure S3. A) Crosslink density and B) molecular weight between crosslinks of dual crosslinked alginate microbeads as a function of methacrylation efficiency. Crosslink density increases with increasing methacrylation efficiency and alginate concentrations. MW between crosslinks decreases with increasing methacrylation efficiency and alginate concentrations.
